# Supplementary figures and images for: Bean Consumption during Childhood Is Associated with Improved Nutritional Outcomes in the First Two Years of Life
Source: MDPI journal article supplement (doi:10.3390/nu16081120), 2024-04-10

## SUPPLEMENTARY MATERIALS

**Supplementary Figure S1. Flow chart of participants**

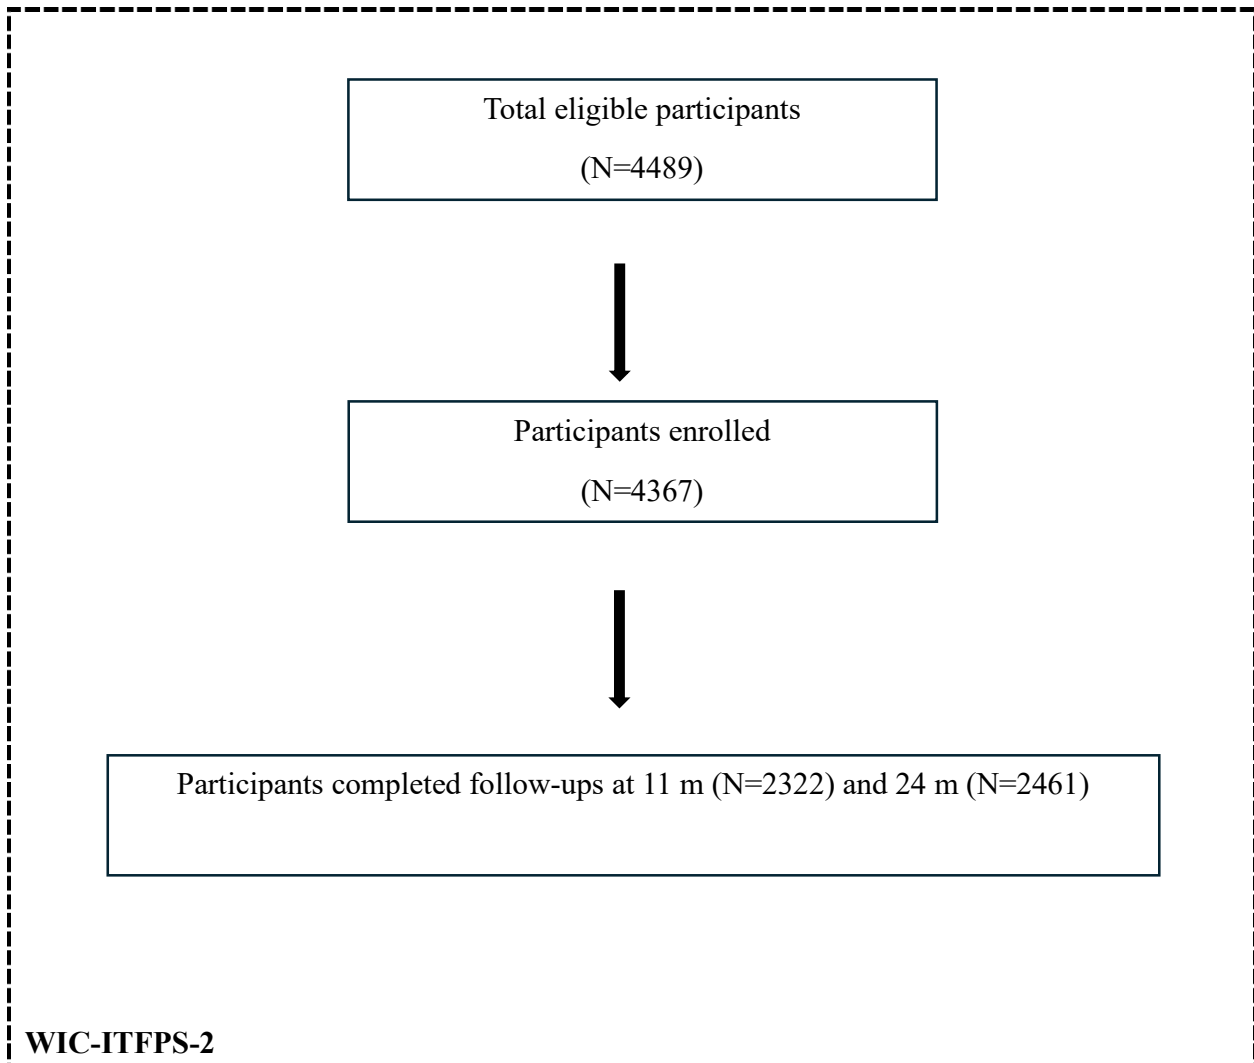

Supplement: s1 [file s1]
